# Supplementary material for: Quantum circuit simulation with a local time-dependent variational principle
Source: Research Square preprint supplement (doi:10.21203/rs.3.rs-8196476/v1), 2025-12-05
Supplement: Supplementary file 1 [file ed574ee0238457eb7b2f2717.pdf]

# Supplementary information: Quantum circuit simulation with a local time-dependent variational principle

## A. Generators of quantum gates

We list the generators of quantum gates used in our experiments. Here,  $\theta$  denotes the rotation angle parameter. The generators are provided in the convention  $U(\theta) = \exp(-i\theta H)$ , where  $H$  is the generator. Note that we only use the generators of two-qubit gates,

$$R_{zz}(\theta) = \exp\left(-i\frac{\theta}{2}Z \otimes Z\right), \quad R_{yy}(\theta) = \exp\left(-i\frac{\theta}{2}Y \otimes Y\right), \quad (1)$$

$$R_{xx}(\theta) = \exp\left(-i\frac{\theta}{2}X \otimes X\right), \quad \text{CNOT} = \exp\left(-i\frac{\pi}{4}(I - Z) \otimes (I - X)\right). \quad (2)$$

since single qubit gates are contracted directly into the corresponding site tensors without using TDVP.

## B. Benchmark circuits

In this work, we benchmark local TDVP on four classes of quantum circuits that reflect a broad range of structures found in many-body simulation and variational quantum algorithms. These include: (1) the one-dimensional Heisenberg model with open and periodic boundary conditions, (2) the two-dimensional Ising model on a square lattice, (3) quantum approximate optimization algorithm (QAOA) circuits using  $R_x$  and  $R_{zz}$  gates, and (4) hardware-efficient ansatz (HEA) circuits with random single- and two-qubit gates. All circuits were constructed to exhibit nontrivial entanglement dynamics and include both local and non-local interactions. For the Hamiltonian circuits, standard first-order Trotterization techniques are used, while the variational circuits follow common layouts from quantum algorithm design.

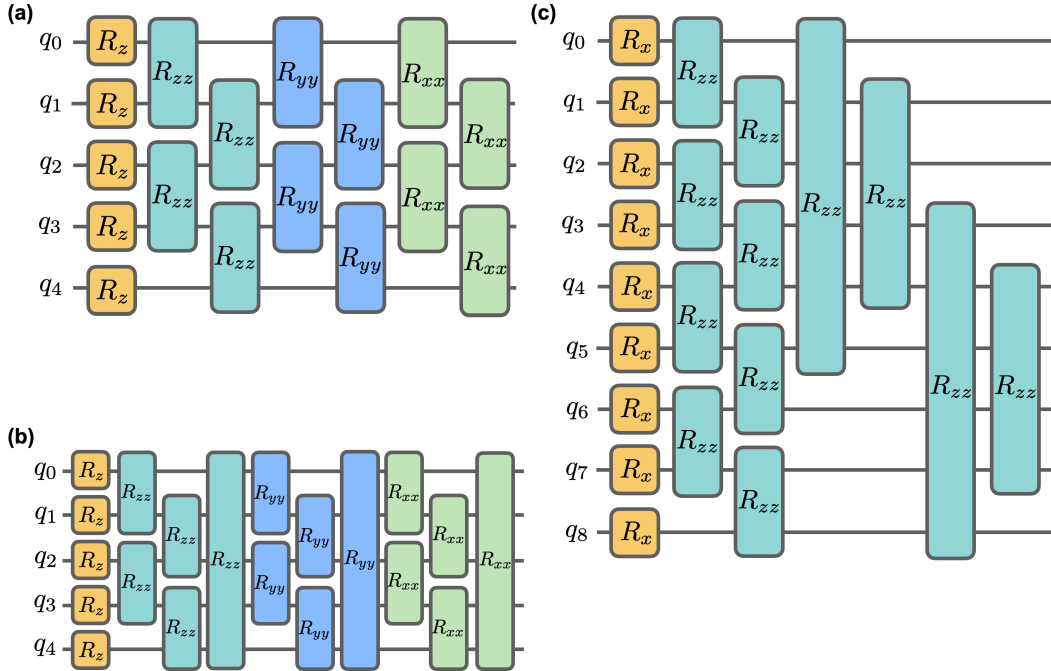

FIG. 1. **Trotterized quantum circuits for the models benchmarked in this work.** (a) Circuit for the open boundary one-dimensional Heisenberg model. (b) Circuit for the periodic one-dimensional Heisenberg model. (c) Circuit for the  $3 \times 3$  two-dimensional Ising model, mapped to a one-dimensional snaking MPS layout.

### 1. One-dimensional Heisenberg model

The simulated circuit corresponds to the Trotterized evolution under the one-dimensional XXX Heisenberg Hamiltonian (with open and periodic boundaries)

$$H_{\text{Heis}} = \sum_{\langle i,j \rangle} J (X_i X_j + Y_i Y_j + Z_i Z_j) + h \sum_i Z_i, \quad (3)$$

where the sum is over nearest neighbors (and includes a term connecting  $L - 1$  and  $0$  for periodic boundary conditions). These are performed at the critical point  $J = h = 1$  with a timestep  $\delta t = 0.1$ . Each Trotter step consists of the following gates, parameterized as

$$R_z = \exp(-i\delta t h Z), \quad R_{xx} = \exp(-i\delta t J X \otimes X), \quad R_{yy} = \exp(-i\delta t J Y \otimes Y), \quad R_{zz} = \exp(-i\delta t J Z \otimes Z). \quad (4)$$

The gates are applied in an even-odd/odd-even decomposition across the chain.  $R_z$  rotations are applied to all qubits, followed by  $R_{zz}$ ,  $R_{xx}$ , and  $R_{yy}$  gates acting on all nearest-neighbor pairs in two sweeps (even-odd and odd-even); for periodic boundaries, gates are additionally applied between sites  $(L - 1, 0)$ . The non-periodic and periodic Heisenberg circuit for 5 sites is illustrated in Fig. 1(a) and Fig. 1(b).

### 2. Two-dimensional Ising model

The simulated circuit corresponds to the Trotterized evolution under the two-dimensional Ising Hamiltonian on a rectangular  $N = n_{\text{rows}} \times n_{\text{cols}}$  lattice

$$H_{\text{Ising}} = J \sum_{\langle i,j \rangle} Z_i Z_j + g \sum_i X_i, \quad (5)$$

where  $\langle i, j \rangle$  denotes all nearest-neighbor pairs on the grid. This is simulated at the critical point  $J = g = 1$  with a timestep  $\delta t = 0.1$ . Each Trotter step consists of the following gates, parameterized as

$$R_x = \exp(-i\delta t g X), \quad R_{zz} = \exp(-i\delta t J Z \otimes Z). \quad (6)$$

A snaking (serpentine) mapping of the two-dimensional grid to a one-dimensional qubit ordering is used for efficient MPS simulation.  $R_x$  rotations are applied to all qubits, followed by  $R_{zz}$  gates acting on all horizontally and vertically adjacent pairs, using even-odd and odd-even decompositions within each row and column which is illustrated for 9 sites in Fig. 1(c).

### 3. QAOA circuits

To benchmark performance on variational quantum algorithms, we simulate the Quantum Approximate Optimization Algorithm (QAOA) for a 1D Ising cost Hamiltonian. Each circuit consists of  $p$  layers of alternating unitaries derived from a cost Hamiltonian and a mixing Hamiltonian:

$$U(\vec{\gamma}, \vec{\beta}) = \prod_{l=1}^p \left[ \exp \left( -i\beta_l \sum_i X_i \right) \exp \left( -i\gamma_l \sum_{\langle i,j \rangle} Z_i Z_j \right) \right]. \quad (7)$$

Each layer is implemented with a sequence of single-qubit  $R_x(\beta_\ell) = \exp(-i\beta_\ell X)$  gates, followed by two-qubit  $R_{zz}(\gamma_\ell) = \exp(-i\gamma_\ell Z \otimes Z)$  gates applied to all nearest-neighbor pairs, using even-odd and odd-even sweeps as in the Trotterized models. The angles  $(\vec{\gamma}, \vec{\beta})$  are randomly sampled from a uniform distribution (such that each gate's rotation angle is uniquely defined) to create diverse and entangling circuits, rather than optimized for a specific problem instance. This setup allows us to probe TDVP's behavior on variational, non-Hamiltonian circuits with structured but non-integrable dynamics.

### 4. Hardware-efficient ansatz (HEA) circuits

We also benchmark the method on *hardware-efficient ansatz* (HEA) circuits, which are widely used in variational quantum algorithms due to their shallow depth and compatibility with quantum hardware constraints. Each HEA layer consists of arbitrary

single-qubit rotations followed by entangling two-qubit gates between neighboring qubits

$$U_{\text{HEA}} = \prod_{l=1}^d \left[ \bigotimes_i U_3^{(i)}(\theta_l) \right] \cdot \left[ \prod_{\langle i,j \rangle} \text{CZ}_{i,j} \right], \quad (8)$$

where  $U_3(\theta) = R_z(\theta_1)R_y(\theta_2)R_z(\theta_3)$  is a universal single-qubit gate, and CZ is the controlled- $Z$  gate. We use a brickwork entangling pattern, alternating between even-odd and odd-even layers. The single-qubit parameters are sampled randomly from a uniform distribution, generating circuits with high expressivity and low regularity. This circuit class serves as a stress test for TDVP under irregular, high-depth gate sequences and random entanglement growth.
